# Supplementary material for: Efficient and modular CRISPR‐Cas9 vector system for Physcomitrella patens
Source: PubMed Central journal article supplement — Plant Direct. 2019 Sep 12;3(9):e00168. doi: 10.1002/pld3.168 (PMC6739617; doi:10.1002/pld3.168), 2019-09-12
Supplement: PLD3-3-e00168-s003.pdf [file PLD3-3-e00168-s003.pdf]

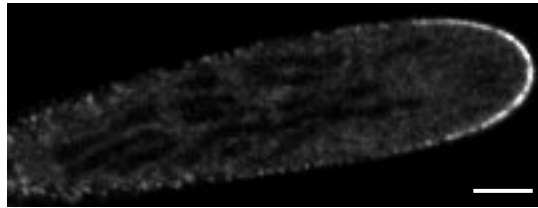

**Supplemental Figure 3**

Single focal plane confocal image of an apical cell from the moss line where mEGFP was inserted at the 3' end of Pp3c22\_1100. Scale bar, 5  $\mu$ m.
