# Supplementary material for: Efficient and modular CRISPR‐Cas9 vector system for Physcomitrella patens
Source: PubMed Central journal article supplement — Plant Direct. 2019 Sep 12;3(9):e00168. doi: 10.1002/pld3.168 (PMC6739617; doi:10.1002/pld3.168), 2019-09-12
Supplement: PLD3-3-e00168-s004.pdf [file PLD3-3-e00168-s004.pdf]

**Supplemental Table 1 – A table of primers and oligos used in this study**

| Primer ID | Sequence (5'->3')                                       | Purpose                                                                       |
|-----------|---------------------------------------------------------|-------------------------------------------------------------------------------|
| UM_2149   | GGCGCGCCGAGCTCGAATTCGTCCATTGAAGC                        | PpU6 promoter amplicon                                                        |
| UM_2151   | GTCGACCCTGCCATGGGTTGTAAGTCCTCCACCTTCC                   | PpU6 promoter amplicon                                                        |
| UM_2206   | TGAGACCTTGGTCTCTATGGGTTGTAAGTCCTCCACCTTC                | PpU6 promoter + Bsal amplicon                                                 |
| UM_2207   | AGAGACCAAGGTCTCAGTTTTAGAGCTATGC                         | Bsal + sgRNA amplicon                                                         |
| UM_2208   | CAGTCACGACGTTGTAAAACGACGG                               | Bsal + sgRNA amplicon                                                         |
| UM_2320   | GGGGACAAGTTTGTACAAAAAAGCAGGCTCCCTTCACCGTCAGATGC         | pENTR-PpU6P-L1L2-sgRNA, pENTR-PpU6P-L1R5-sgRNA, pENTR-PpU6P-L1L4-sgRNA insert |
| UM_2321   | GGGGACAAGTTTGTATACAAAAGTTGTGAGCTCGAATTCGTCCATTGAAGC     | pENTR-PpU6P-L1R5-sgRNA insert                                                 |
| UM_2322   | GGGGACAAGTTTGTATACAAAAGTTGCCCTTCACCGTCAGATGC            | pENTR-PpU6P-L5L2-sgRNA, pENTR-PpU6P-L5L4-sgRNA insert                         |
| UM_2323   | GGGGACCAACTTTGTACAAGAAAGCTGGGTAGAGCTCGAATTCGTCCATTGAAGC | pENTR-PpU6P-L1L2-sgRNA, pENTR-PpU6P-L3L2-sgRNA, pENTR-PpU6P-L5L2-sgRNA insert |
| UM_2324   | GGGGACAAGTTTGTATAGAAAAGTTGGGTGGAGCTCGAATTCGTCCATTGAAGC  | pENTR-PpU6P-L1L4-sgRNA, pENTR-PpU6P-L5L4-sgRNA insert                         |
| UM_2325   | GGGGACAAGTTTCTATACAAAAGTTGCCCTTCACCGTCAGATGC            | pENTR-PpU6P-R4R3-sgRNA insert                                                 |
| UM_2326   | GGGGACAAGTTTATTATACAAAAGTTGTGAGCTCGAATTCGTCCATTGAAGC    | pENTR-PpU6P-R4R3-sgRNA insert                                                 |
| UM_2327   | GGGGACAAGTTTGTATAATAAAGTTGCCCTTCACCGTCAGATGC            | pENTR-PpU6P-L3L2-sgRNA insert                                                 |
| DC_173    | GGGGACAAGTTTCTATACAAAAGTTGTAGCTGATTAAGTTGGGTAACGCCAGG   | stop cassette amplicon                                                        |
| DC_174    | GGGGACAAGTTTATTATACAAAAGTTGTAGGCTTTACACTTTATGCTTCCG     | stop cassette amplicon                                                        |
| UM_2117   | GGCAGGGTCGACAATGGTGAGCAA                                | NLS-GFP-GUS protospacer                                                       |
| UM_2118   | AAACTTGCTCACCATTGTGCACCC                                | NLS-GFP-GUS protospacer                                                       |
| UM_2657   | CCATCTATCTTCGAACGCATGCGG                                | sgRNA-1 protospacer (Pp3c8_18830V3.1)                                         |
| UM_2658   | AAACCCGCATGCGTTCGAAGATAG                                | sgRNA-1 protospacer (Pp3c8_18830V3.1)                                         |
| UM_2695   | TCCATCCGTCTCAGAAG                                       | Site 1 genotyping amplicon (Pp3c8_18830V3.1)                                  |
| UM_2696   | AACGACTATCAAATGGTGCC                                    | Site 1 genotyping amplicon (Pp3c8_18830V3.1)                                  |
| UM_2659   | CCATCACAGGTGCAGTCCCCTGTG                                | sgRNA-5 protospacer (Pp3c8_18850V3)                                           |
| UM_2660   | AAACCACACGGGACTGCACCTGTG                                | sgRNA-5 protospacer (Pp3c8_18850V3)                                           |
| UM_2697   | CTACTTAGGGCACAGCTTC                                     | Site 5 genotyping amplicon (Pp3c8_18850V3)                                    |
| UM_2698   | CTACTAGGTGGTCAGCAAC                                     | Site 5 genotyping amplicon (Pp3c8_18850V3)                                    |
| UM_2661   | CCATCTGCGGGAGAACAGACAGAA                                | sgRNA-6 protospacer (Pp3c23_15670V3)                                          |
| UM_2662   | AAACTTCTGTCTGTTCTCCCGCAG                                | sgRNA-6 protospacer (Pp3c23_15670V3)                                          |
| UM_2699   | TGCTGTAGGTTGCTTGAG                                      | Site 6 genotyping amplicon (Pp3c23_15670V3)                                   |
| UM_2700   | CTGAAATTGCCTTACTTCGC                                    | Site 6 genotyping amplicon (Pp3c23_15670V3)                                   |
| UM_2663   | CCATTTATGCCGACGGTCCAGTGA                                | sgRNA-2 protospacer (Pp3c18_4770V3)                                           |

|         |                                                             |                                             |
|---------|-------------------------------------------------------------|---------------------------------------------|
| UM_2664 | AAACTCACTGGACCGTCGGCATAA                                    | sgRNA-2 protospacer (Pp3c18_4770V3)         |
| UM_2701 | AGCTAAAGCTGTTGGACG                                          | Site 2 genotyping amplicon (Pp3c18_4770V3)  |
| UM_2702 | AGCCTTCTTGTACGCATTC                                         | Site 2 genotyping amplicon (Pp3c18_4770V3)  |
| UM_2665 | CCATGCTATGACCAACGTCCCCTC                                    | sgRNA-3 protospacer (Pp3c22_15110V3)        |
| UM_2666 | AAACGAGGGGACGTTGGTCATAGC                                    | sgRNA-3 protospacer (Pp3c22_15110V3)        |
| UM_2703 | TATTCTACGATATGCAGTTGGG                                      | Site 3 genotyping amplicon (Pp3c22_15110V3) |
| UM_2704 | CCTGAGTCCTTCTTCCTG                                          | Site 3 genotyping amplicon (Pp3c22_15110V3) |
| UM_2655 | CCATGACAGCCCTCGTAATGCCGA                                    | sgRNA-4 protospacer (Pp3c4_16430V3)         |
| UM_2656 | AAACTCGGCATTACGAGGGCTGTC                                    | sgRNA-4 protospacer (Pp3c4_16430V3)         |
| UM_2693 | ATTGACAAGGTGGGATGTG                                         | Site 4 genotyping amplicon (Pp3c4_16430V3)  |
| UM_2694 | GAGTCCAGACAAACTTCAGC                                        | Site 4 genotyping amplicon (Pp3c4_16430V3)  |
| DC_9    | CCATTCACCGCTTCTAAAGGTCCC                                    | sgRNA-7 protospacer (Pp3c16_8300)           |
| DC_10   | AAACGGGACCTTTAGAAAGCGGTGA                                   | sgRNA-7 protospacer (Pp3c16_8300)           |
| DC_11   | CCATCACGCGAACCAGATTAATCA                                    | sgRNA-8 protospacer (Pp3c16_8300)           |
| DC_12   | AAACTGATTAATCTGGTTCGCGTG                                    | sgRNA-8 protospacer (Pp3c16_8300)           |
| DC_45   | CTTCGTCATGGCGCAGG                                           | Pp3c16_8300 genotyping amplicon             |
| DC_461  | GCCCAGCTTCAAACGTAACC                                        | Pp3c16_8300 genotyping amplicon             |
| DC_30   | CCATAGCACAGGCGACGGTTGCAC                                    | sgRNA-9 protospacer (Pp2c9_8040)            |
| DC_31   | AAACGTGCAACCGTCGCCTGTGCT                                    | sgRNA-9 protospacer (Pp2c9_8040)            |
| DC_32   | CCATCGGCTTTGCTTGAATAGAC                                     | sgRNA-10 protospacer (Pp2c9_8040)           |
| DC_33   | AAACGTCTATTCCAAGCAAAGCCG                                    | sgRNA-10 protospacer (Pp2c9_8040)           |
| DC_61   | TCACCGTCCTCGTTGTAG                                          | Pp2c9_8040 genotyping amplicon              |
| DC_62   | CAAACATCGACAAGCTACACG                                       | Pp2c9_8040 genotyping amplicon              |
| DC_118  | CCATATAGCCGTTGATCTATTTCC                                    | Pp3c22_1100 protospacer                     |
| DC_119  | AAACGGAAATAGATCAACGGCTAT                                    | Pp3c22_1100 protospacer                     |
| DC_108  | GGGGACAAGTTTGTACAAAAAAGCAGGCTACT<br>ACAAGCGGAGATTGCTCAAGC   | Pp3c22_1100 5' homology amplicon            |
| DC_109  | GGGGACAACCTTTGTATAGAAAAGTTGGGTGTT<br>TCCAGGCCACAGCATCAATCTC | Pp3c22_1100 5' homology amplicon            |
| DC_112  | GGGGACAACCTTTGTATAATAAAGTTGATCAAC<br>GGCTATACTCATTTCTCC     | Pp3c22_1100 3' homology amplicon            |
| DC_113  | GGGGACCACTTTGTACAAGAAAGCTGGGTAAT<br>CTCACCTTCCGTTCTAAATACG  | Pp3c22_1100 3' homology amplicon            |
| DC_120  | CATTTTCGTCGGAGTGTCGG                                        | Pp3c22_1100 genotyping amplicon             |
| DC_121  | GGTGTACAGGTTGATGAAGC                                        | Pp3c22_1100 genotyping amplicon             |
| DC_225  | CCATCGATTCTTGCAGTCCGAAT                                     | Hygromycin resistance protospacer           |
| DC_226  | AAACATTCGGACCGCAAGGAATCG                                    | Hygromycin resistance protospacer           |
| DC_9    | CCATTCACCGCTTCTAAAGGTCCC                                    | Pp3c16_8300 tagging protospacer             |
| DC_10   | AAACGGGACCTTTAGAAAGCGGTGA                                   | Pp3c16_8300 tagging protospacer             |
| DC_179  | GGGGACAAGTTTGTACAAAAAAGCAGGCTCAT<br>GGAAACATGGTTGAAATTATACG | Pp3c16_8300 5' homology amplicon            |
| DC_180  | GGGGACAACCTTTGTATAGAAAAGTTGGGTGAG<br>AAACGCAAATCGACAGC      | Pp3c16_8300 5' homology amplicon            |

|        |                                                            |                                          |
|--------|------------------------------------------------------------|------------------------------------------|
| DC_181 | GGGGACAACCTTTGTATAATAAAGTTGGGATGT<br>ATGTCAGAGAGAGACCAGG   | Pp3c16_8300 3' homology amplicon         |
| DC_182 | GGGGACCACTTTGTACAAGAAAGCTGGGTGAA<br>AGTATAATCACAGGCCTCAACG | Pp3c16_8300 3' homology amplicon         |
| DC_461 | CCTTTCCACAATTTAAATTTAAAGAATAAGAC<br>ATGAG                  | Pp3c16_8300 HDR genotyping amplicon      |
| DC_401 | GCACGAACATGAGTGAGG                                         | Pp3c16_8300 HDR genotyping amplicon      |
| DC_272 | GACCAGGTACCTTTAGAAGC                                       | Pp3c16_8300 site-directed mutagenesis    |
| DC_273 | GCTTCTAAAGGTACCTGGTC                                       | Pp3c16_8300 site-directed mutagenesis    |
| DC_159 | GGGGACAACCTTTTCTATACAAAGTTGAAGGAT<br>CCATGGTGAGCAAGGGCGAG  | mEGFP and mRuby2 cds amplicon (C+N term) |
| DC_111 | GGGGACAACCTTTATTATACAAAGTTGTTTACT<br>TGTACAGCTCGTCCATGC    | mEGFP and mRuby2 cds amplicon (C term)   |
| DC_178 | GGGGACAACCTTTATTATACAAAGTTGTCTTGT<br>ACAGCTCGTCCATGCC      | mEGFP and mRuby2 cds amplicon (N-term)   |
| EYFPF  | AATGGGATCCATGGTGAGCAAGGGCGAG                               | mRuby-pGEM insert                        |
| EYFPR  | AATGAGATCTCTTGTACAGCTCGTCCATGC                             | mRuby-pGEM insert                        |
